# Supplementary material
Source: Springer Nature journal article supplement (https://www.springermedizin.de/resource/supplementary/13045_2014_400_MOESM12_ESM.pdf/9661292)

A

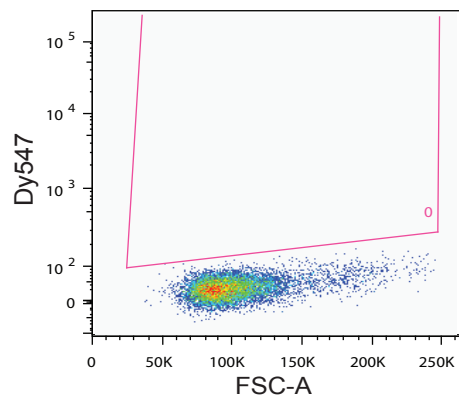

MEL

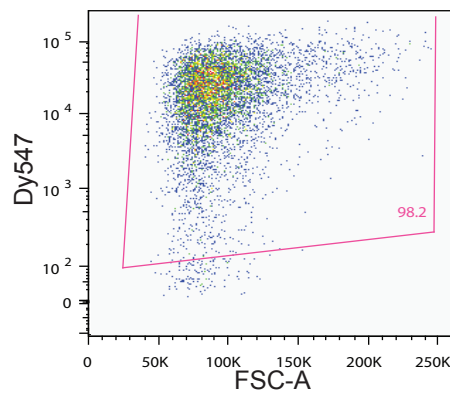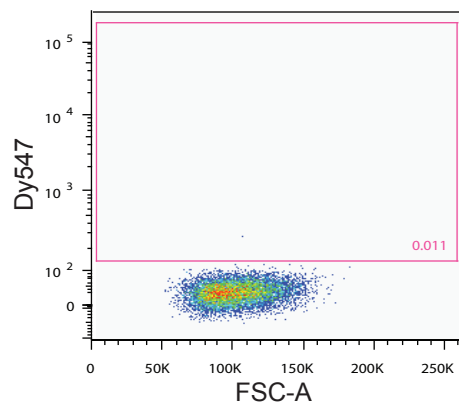

MPRO

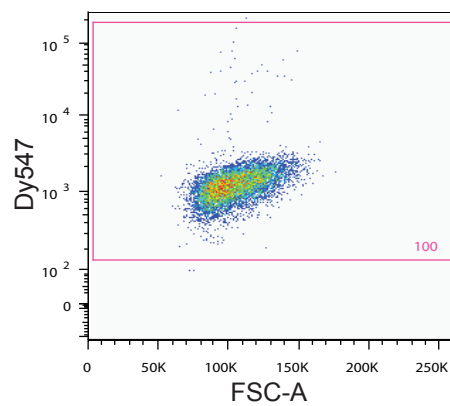

B

Non-transfected MEL

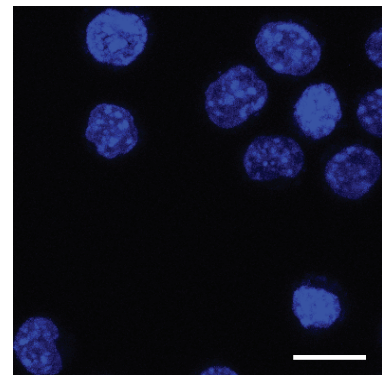

MEL transfected with Dy547-labelled inhibitor control

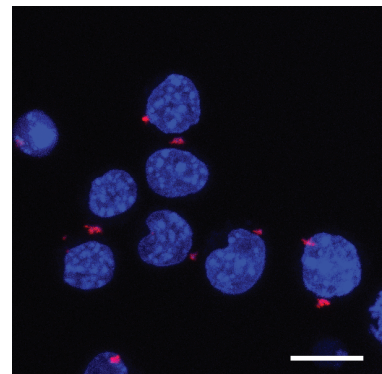

C

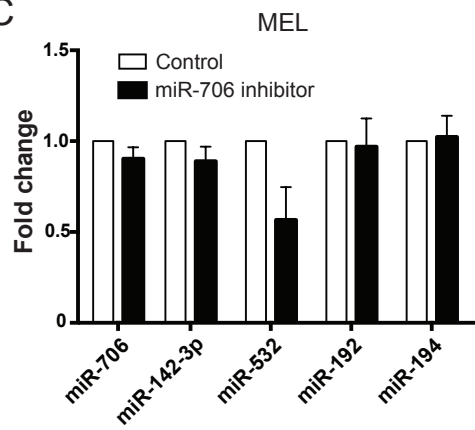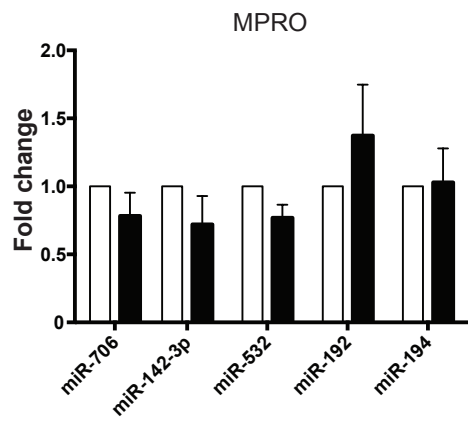

D

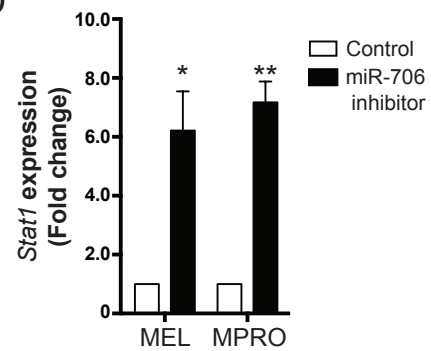

Supplement: MOESM12 [file 9661292]
